# Supplementary material for: Computational insights into the binding mechanism of antagonists with neuropeptide B/W receptor 1
Source: Royal Society of Chemistry journal article supplement (doi:10.1039/c4mb00214h), 2014-06-09
Supplement: c4mb00214h1.pdf [file c4mb00214h1.pdf]

## Electronic supplementary information

### Computational insights into the binding mechanism of antagonists with Neuropeptide B/W Receptor 1

**Mahesh Chandra Patra<sup>a,c,\*</sup>, Jitendra Maharana<sup>b,c,§</sup>, Budheswar Dehury<sup>d</sup> and Sachinandan De<sup>a</sup>**

<sup>a</sup>Animal Genomics Laboratory, Animal Biotechnology Centre, National Dairy Research Institute,  
Karnal-132001, Haryana, India

<sup>b</sup>Biotechnology Laboratory, Central Inland Fisheries Research Institute,  
Barrackpore, Kolkata-700120, West Bengal, India

<sup>c</sup>BIF-Centre, Department of Bioinformatics, Orissa University of Agriculture and Technology,  
Bhubaneswar-751003, Odisha, India

<sup>d</sup>Department of Agricultural Biotechnology, Assam Agricultural University,  
Jorhat-785013, Assam, India

\*Corresponding author:

Mahesh Chandra Patra,  
Animal Genomics Lab, Animal Biotechnology Centre,  
National Dairy Research Institute,  
Karnal-132001, Haryana, India  
E-mail: [ml2mahesh@gmail.com](mailto:ml2mahesh@gmail.com)  
Tel.: +91-1842259503; Fax +91-1842250042

§Corresponding author:

Jitendra Maharana,  
Biotechnology Laboratory,  
Central Inland Fisheries Research Institute,  
Barrackpore, Kolkata-700120, West Bengal, India  
E-mail: [jitued@gmail.com](mailto:jitued@gmail.com)

*Supplementary Figures*

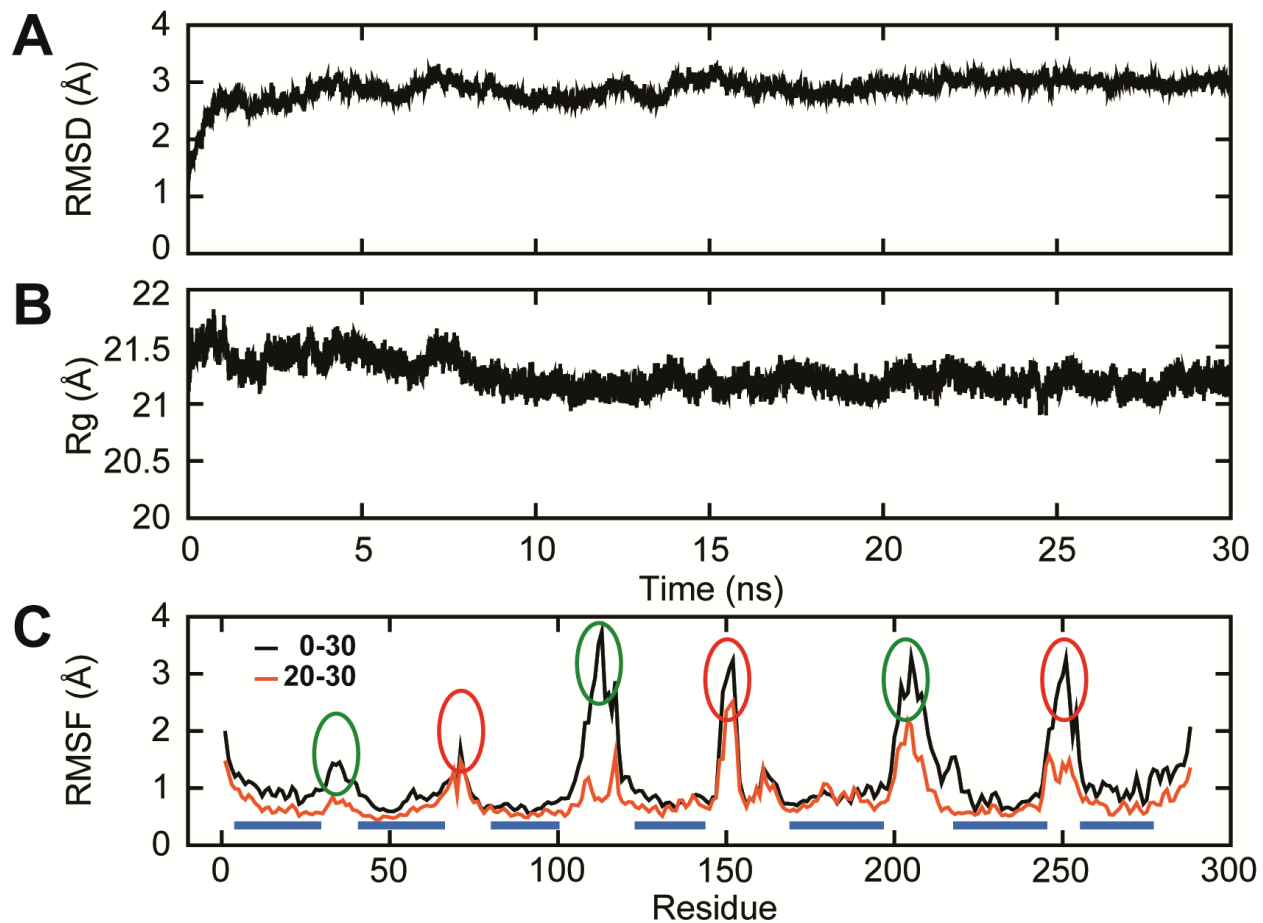

**Fig. S1**

Analysis of the stability parameters of the modeled NPBWR1 as a function of 30-ns MD simulation time. (a) RMSD as a function of time, (b) Rg as a function of time and (c) RMSF as a function of residue number. The RMSF was measured throughout (black) and between 20 and 30-ns (orange) MD trajectories. TM helices are indicated with blue bars at the bottom of the curves, ECL and ICL regions are marked with green and red circles, respectively.



## Supplementary Tables

**Table S1**

Comparative structure validation scores of NPBWR1 and its template, NOFQ receptor (4EA3)

| Servers    |                                  | NPBWR1 | 4EA3 (template) |
|------------|----------------------------------|--------|-----------------|
| Procheck   | Most favored regions (%)         | 91.40  | 92.30           |
|            | Additionally allowed Regions (%) | 7.50   | 7.30            |
|            | Generously allowed Regions (%)   | 0.40   | 0.00            |
|            | Disallowed regions (%)           | 0.80   | 0.40            |
|            | G-factor                         | 0.09   | 0.34            |
| Verify3D   | Averaged 3D-1D Score > 0.2 (%)   | 57.79  | 52.33           |
| ERRAT      | Overall Quality (%)              | 97.13  | 93.46           |
| ProSA      | Z-Score                          | -3.87  | -2.99           |
| ProQ       | LG score                         | 2.46   | 2.88            |
|            | MaxSub                           | 0.18   | 0.23            |
| MolProbity | C $\beta$ deviations >0.25Å      | 0      | 0               |
|            | Residues with bad bonds (%)      | 0.00   | 0.00            |
|            | Residues with bad angles (%)     | 0.00   | 0.00            |

**Table S2**

The various energy scores (kcal mol<sup>-1</sup>) obtained for NPBWR1-antagonist complexes through Autodock

| Conformations | Ligand Efficiency | Intermol. Energy | vdWhbdesolv energy | Electrostatic energy | Unbound Energy | Binding energy |
|---------------|-------------------|------------------|--------------------|----------------------|----------------|----------------|
| 1z            | -0.33             | -9.42            | -9.20              | -0.22                | -0.34          | -8.23          |
| 9h            | -0.27             | -9.31            | -9.25              | -0.05                | -0.96          | -8.11          |
| 9i            | -0.23             | -11.58           | -10.32             | -1.97                | -1.97          | -8.81          |
